# Supplementary material for: The Role of Trait Mindfulness in the Association between Loneliness and Psychological Distress
Source: Springer Nature journal article supplement (doi:10.1007/s12671-023-02184-7), 2023-08-01
Supplement: MOESM1 [file 25881168]

**SUPPLEMENTARY MATERIALS****Supplementary Table S1** Demographic Comparison Between Student and Community

Samples

| Demographic  | Student    |                | Community |                | Total      |                |
|--------------|------------|----------------|-----------|----------------|------------|----------------|
|              | <i>n</i>   | % <sup>1</sup> | <i>n</i>  | % <sup>1</sup> | <i>n</i>   | % <sup>1</sup> |
| <b>Sex</b>   |            |                |           |                |            |                |
| Female       | 176        | 59.3           | 59        | 19.9           | 235        | 79.1           |
| Male         | 47         | 15.8           | 14        | 4.7            | 61         | 20.5           |
| Other        | 1          | 0.3            | 0         | 0              | 1          | 0.3            |
| <b>Age</b>   |            |                |           |                |            |                |
| 18-29        | 62         | 20.9           | 3         | 1.0            | 65         | 21.9           |
| 30-39        | 75         | 25.3           | 35        | 11.8           | 110        | 37.0           |
| 40-49        | 63         | 21.2           | 15        | 5.0            | 78         | 26.3           |
| 50-59        | 20         | 6.7            | 14        | 4.7            | 34         | 11.4           |
| 60-69        | 4          | 1.3            | 2         | 0.7            | 6          | 2.0            |
| 70-75        | 0          | 0              | 4         | 1.3            | 4          | 1.3            |
| <b>Total</b> | <b>224</b> | <b>75.4</b>    | <b>73</b> | <b>24.6</b>    | <b>297</b> | <b>100</b>     |

Note. <sup>1</sup> Percentage of total sample of  $n = 297$ .

**Supplementary Figure S2** Proportional standardized effect sizes for a simple and multiple mediation model with trait mindfulness mediating the loneliness-psychological distress association.

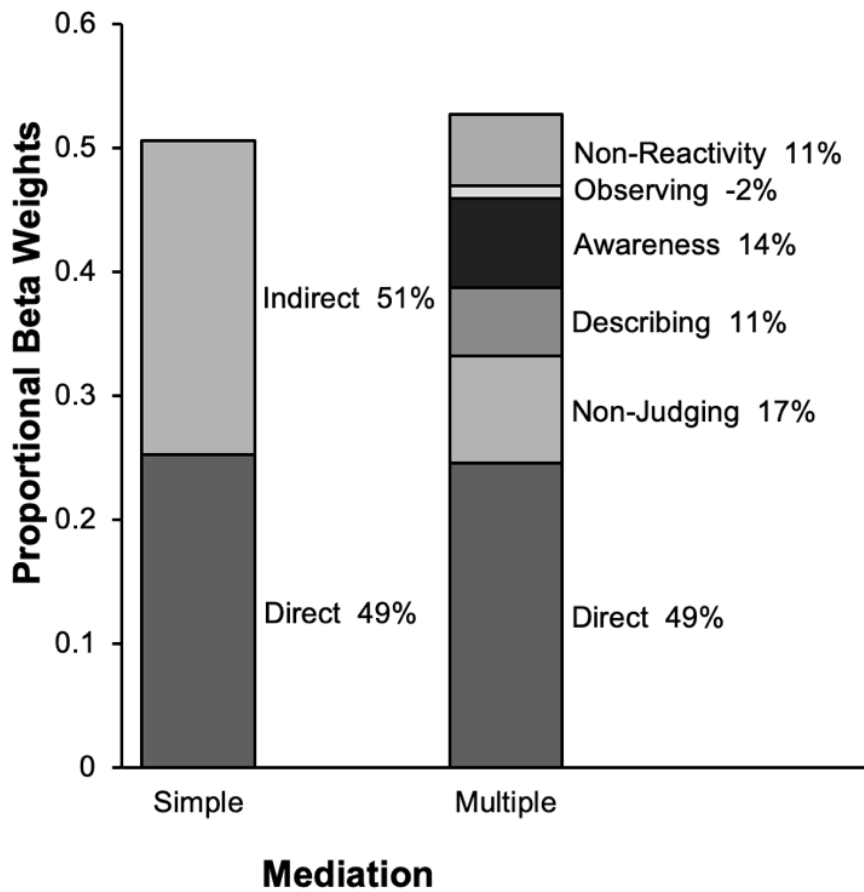

*Note.* Percentages are proportional contributions to the total effect for each model. Multiple mediation total indirect effect = 51%. Both models controlled for age and gender.
